# Supplementary material for: Physical activity monitoring to assess disability progression in multiple sclerosis
Source: PubMed Central journal article supplement (PMC7727071; doi:10.1177/2055217320975185), 2020-12-07
Supplement: sj-pdf-1-mso-10.1177_2055217320975185.pdf [file sj-pdf-1-mso-10.1177_2055217320975185.pdf]

## MS Journal Appendix for MRI methodology

| Hardware                          |         |
|-----------------------------------|---------|
| Field strength                    | 3T      |
| Manufacturer                      | Siemens |
| Model                             | Skyra   |
| Coil type<br>(e.g. head, surface) | Head    |
| Number of coil channels           | 20      |

| Acquisition sequence                                              |                      |
|-------------------------------------------------------------------|----------------------|
| Type<br>(e.g. FLAIR, DIR, DTI, fMRI)                              | MP-RAGE              |
| Acquisition time                                                  | 5:38                 |
| Orientation                                                       | Axial                |
| Alignment<br>(e.g. anterior commissure/posterior commissure line) | AC-PC line           |
| Voxel size                                                        | 1.0 x 1.0 x 1.0 mm   |
| TR                                                                | 2200 ms              |
| TE                                                                | 2.45 ms              |
| TI                                                                | 900 ms               |
| Flip angle                                                        | 8°                   |
| NEX                                                               | 1                    |
| Field of view                                                     | 250 x 250 x 176 mm   |
| Matrix size                                                       | 250 x 250 x 176      |
| Parallel imaging                                                  | <u>Yes</u> <u>No</u> |
| If used, parallel imaging method:<br>(e.g. SENSE, GRAPPA)         | GRAPPA x2            |
| Cardiac gating                                                    | Yes <u>No</u>        |
| If used, cardiac gating method:<br>(e.g. PPU or ECG)              |                      |
| Contrast enhancement                                              | Yes <u>No</u>        |

**Acquisition sequence**

If used, provide name of contrast agent, dose and timing of scan post-contrast administration

n/a

Other parameters:

| <b>Image analysis methods and outputs</b>                                                                                                      |                                |
|------------------------------------------------------------------------------------------------------------------------------------------------|--------------------------------|
| <b>Lesions</b>                                                                                                                                 |                                |
| Type<br>(e.g. Gd-enhancing, T2-hyperintense, T1-hypointense)                                                                                   | n/a                            |
| Analysis method                                                                                                                                |                                |
| Analysis software                                                                                                                              |                                |
| Output measure<br>(e.g. count or volume [ml])                                                                                                  |                                |
| <b>Tissue volumes</b>                                                                                                                          |                                |
| Type<br>(e.g. whole brain, grey matter, white matter, spinal cord)                                                                             | Whole brain                    |
| Analysis method                                                                                                                                | Mean brain edge displacement   |
| Analysis software                                                                                                                              | SIENA                          |
| Output measure<br>(e.g. absolute tissue volume in ml, tissue volume as a fraction of intracranial volume, percentage change in tissue volumes) | Percentage brain volume change |
| <b>Tissue measures (e.g. MTR, DTI, T1-RT, T2-RT, T2*, T2', <sup>1</sup>H-MRS, perfusion, Na)</b>                                               |                                |
| Type<br>(e.g. whole brain, grey matter, white matter, spinal cord, normal-appearing grey matter or white matter)                               | n/a                            |
| Analysis method                                                                                                                                |                                |
| Analysis software                                                                                                                              |                                |
| Output measure                                                                                                                                 |                                |
| <b>Other MRI measures (e.g. functional MRI)</b>                                                                                                |                                |
| Type<br>(e.g. whole brain, grey matter, white matter, spinal cord, normal-appearing grey matter or white matter)                               | n/a                            |
| Analysis method                                                                                                                                |                                |
| Analysis software                                                                                                                              |                                |
| Output measure                                                                                                                                 |                                |

**Other analysis details:**
