# Supplementary material for: Physical activity monitoring to assess disability progression in multiple sclerosis
Source: PubMed Central journal article supplement (PMC7727071; doi:10.1177/2055217320975185), 2020-12-07
Supplement: sj-pdf-2-mso-10.1177_2055217320975185.pdf [file sj-pdf-2-mso-10.1177_2055217320975185.pdf]

## Supplementary materials

| Assessment time point   | E <sub>A</sub>     | METs               | PhAD               | Steps              |
|-------------------------|--------------------|--------------------|--------------------|--------------------|
| <b>Baseline (n=56)</b>  | 0.875<br>(<0.0001) | 0.796<br>(<0.0001) | 0.844<br>(<0.0001) | 0.817<br>(<0.0001) |
| <b>6 months (n=55)</b>  | 0.897<br>(<0.0001) | 0.730<br>(<0.0001) | 0.877<br>(<0.0001) | 0.777<br>(<0.0001) |
| <b>12 months (n=54)</b> | 0.865<br>(<0.0001) | 0.694<br>(<0.0001) | 0.80<br>(<0.0001)  | 0.850<br>(<0.0001) |
| <b>18 months (n=52)</b> | 0.871<br>(<0.0001) | 0.691<br>(<0.0001) | 0.837<br>(<0.0001) | 0.762<br>(<0.0001) |
| <b>24 months (n=50)</b> | 0.889<br>(<0.0001) | 0.772<br>(<0.0001) | 0.837<br>(<0.0001) | 0.788<br>(<0.0001) |
| <b>30 months (n=48)</b> | 0.878<br>(<0.0001) | 0.820<br>(<0.0001) | 0.861<br>(<0.0001) | 0.819<br>(<0.0001) |

*Supplementary Table 1: Spearman's rho correlation coefficients (p-value) between RAM components and overall RAM scores at each assessment time point.*

| Baseline correlations | E <sub>A</sub>           | METs                     | PhAD                     | Steps                                  | RAM score                |
|-----------------------|--------------------------|--------------------------|--------------------------|----------------------------------------|--------------------------|
| EDSS (n=54)           | <b>-0.343</b><br>(0.011) | <b>-0.411</b><br>(0.002) | <b>-0.325</b><br>(0.016) | <b>-0.589</b><br>( <b>&lt;0.0001</b> ) | <b>-0.419</b><br>(0.002) |
| MSFC (n=55)           | <b>0.316</b><br>(0.019)  | <b>0.365</b><br>(0.006)  | <b>0.305</b><br>(0.024)  | <b>0.493</b><br>(0.0001)               | <b>0.376</b><br>(0.005)  |
| T25FW (n=55)          | <b>-0.331</b><br>(0.014) | <b>-0.412</b><br>(0.002) | <b>-0.317</b><br>(0.018) | <b>-0.640</b><br>( <b>&lt;0.0001</b> ) | <b>-0.444</b><br>(0.001) |
| 9-HPT (n=55)          | -0.212<br>(0.121)        | -0.254<br>(0.061)        | -0.220<br>(0.106)        | <b>-0.436</b><br>(0.001)               | <b>-0.321</b><br>(0.017) |
| MSIS-phys (n= 55)     | <b>-0.299</b><br>(0.027) | <b>-0.287</b><br>(0.033) | <b>-0.278</b><br>(0.04)  | <b>-0.447</b><br>(0.001)               | <b>-0.356</b><br>(0.008) |
| PASAT (n=55)          | 0.137<br>(0.318)         | 0.154<br>(0.261)         | 0.126<br>(0.359)         | 0.134<br>(0.329)                       | 0.105<br>(0.444)         |
| MSIS-psych (n=55)     | -0.142<br>(0.303)        | -0.185<br>(0.177)        | -0.119<br>(0.385)        | -0.234<br>(0.085)                      | -0.143<br>(0.297)        |
| Fatigue score (n=55)  | -0.163<br>(0.235)        | -0.231<br>(0.09)         | -0.153<br>(0.265)        | -0.203<br>(0.138)                      | -0.14<br>(0.307)         |
| BDI (n=54)            | -0.108<br>(0.437)        | -0.052<br>(0.707)        | -0.043<br>(0.758)        | -0.179<br>(0.195)                      | -0.112<br>(0.422)        |

| 6 month correlations | E <sub>A</sub>          | METs                     | PhAD                     | Steps                     | RAM score                |
|----------------------|-------------------------|--------------------------|--------------------------|---------------------------|--------------------------|
| EDSS (n=39)          | -0.140<br>(0.396)       | -0.270<br>(0.097)        | -0.125<br>(0.45)         | <b>-0.355</b><br>(0.027)  | -0.236<br>(0.147)        |
| MSFC (n=55)          | 0.265<br>(0.050)        | 0.225<br>(0.099)         | 0.249<br>(0.066)         | <b>0.316</b><br>(0.019)   | <b>0.342</b><br>(0.011)  |
| T25FW (n=55)         | <b>-0.30</b><br>(0.026) | <b>-0.282</b><br>(0.037) | <b>-0.282</b><br>(0.037) | <b>-0.497</b><br>(0.0001) | <b>-0.421</b><br>(0.001) |
| 9-HPT (n=55)         | -0.147<br>(0.283)       | -0.181<br>(0.187)        | -0.161<br>(0.240)        | <b>-0.333</b><br>(0.013)  | <b>-0.284</b><br>(0.035) |
| MSIS-phys (n=54)     | -0.260<br>(0.057)       | -0.288<br>(0.034)        | -0.246<br>(0.073)        | <b>-0.346</b><br>(0.010)  | <b>-0.323</b><br>(0.017) |
| PASAT (n=55)         | 0.143<br>(0.298)        | 0.005<br>(0.974)         | 0.099<br>(0.472)         | -0.039<br>(0.780)         | 0.102<br>(0.457)         |
| MSIS-psych (n=54)    | -0.071<br>(0.609)       | -0.129<br>(0.352)        | -0.075<br>(0.592)        | -0.155<br>(0.263)         | -0.074<br>(0.593)        |
| Fatigue score (n=55) | -0.184<br>(0.18)        | -0.239<br>(0.079)        | -0.228<br>(0.095)        | -0.215<br>(0.114)         | -0.181<br>(0.187)        |
| BDI (n=55)           | -0.013<br>(0.923)       | -0.098<br>(0.475)        | -0.003<br>(0.985)        | -0.153<br>(0.264)         | -0.041<br>(0.768)        |

| 12 month correlations | E <sub>A</sub>           | METs                     | PhAD                     | Steps                                  | RAM score                              |
|-----------------------|--------------------------|--------------------------|--------------------------|----------------------------------------|----------------------------------------|
| EDSS (n=44)           | <b>-0.381</b><br>(0.011) | <b>-0.370</b><br>(0.013) | <b>-0.387</b><br>(0.009) | <b>-0.514</b><br>(0.003)               | <b>-0.433</b><br>(0.003)               |
| MSFC (n=54)           | <b>0.330</b><br>(0.015)  | <b>0.276</b><br>(0.043)  | <b>0.314</b><br>(0.021)  | <b>0.504</b><br>(0.0001)               | <b>0.395</b><br>(0.003)                |
| T25FW (n=54)          | <b>-0.432</b><br>(0.001) | <b>-0.399</b><br>(0.003) | <b>-0.405</b><br>(0.002) | <b>-0.635</b><br>( <b>&lt;0.0001</b> ) | <b>-0.512</b><br>( <b>&lt;0.0001</b> ) |
| 9-HPT (n=53)          | -0.235<br>(0.09)         | -0.184<br>(0.188)        | -0.230<br>(0.097)        | <b>-0.492</b><br>(0.0002)              | <b>-0.399</b><br>(0.003)               |
| MSIS-phys (n=54)      | -0.235<br>(0.088)        | -0.233<br>(0.089)        | -0.206<br>(0.135)        | <b>-0.456</b><br>(0.001)               | <b>-0.341</b><br>(0.012)               |
| PASAT (n=54)          | 0.116<br>(0.404)         | 0.08<br>(0.566)          | 0.122<br>(0.378)         | 0.032<br>(0.817)                       | 0.027<br>(0.844)                       |
| MSIS-psych (n=54)     | -0.002<br>(0.986)        | -0.021<br>(0.88)         | 0.014<br>(0.922)         | -0.175<br>(0.205)                      | -0.096<br>(0.491)                      |
| Fatigue score (n=54)  | -0.111<br>(0.426)        | -0.11<br>(0.429)         | -0.105<br>(0.45)         | -0.159<br>(0.25)                       | -0.136<br>(0.328)                      |
| BDI (n=54)            | -0.126<br>(0.363)        | -0.099<br>(0.477)        | -0.104<br>(0.452)        | <b>-0.273</b><br>(0.046)               | -0.174<br>(0.208)                      |

| 18 month correlations | E <sub>A</sub>           | METs                     | PhAD                     | Steps                                  | RAM score                              |
|-----------------------|--------------------------|--------------------------|--------------------------|----------------------------------------|----------------------------------------|
| EDSS (n=28)           | -0.284<br>(0.136)        | -0.244<br>(0.203)        | -0.253<br>(0.185)        | <b>-0.585</b><br>(0.001)               | <b>-0.498</b><br>(0.006)               |
| MSFC (n=49)           | 0.241<br>(0.085)         | 0.199<br>(0.158)         | 0.246<br>(0.079)         | <b>0.495</b><br>(0.0002)               | <b>0.476</b><br>(0.0004)               |
| T25FW (n=49)          | <b>-0.328</b><br>(0.018) | <b>-0.304</b><br>(0.028) | <b>-0.329</b><br>(0.017) | <b>-0.543</b><br>( <b>&lt;0.0001</b> ) | <b>-0.490</b><br>(0.0002)              |
| 9-HPT (n=49)          | <b>-0.347</b><br>(0.013) | <b>-0.357</b><br>(0.011) | <b>-0.371</b><br>(0.008) | <b>-0.510</b><br>(0.0002)              | <b>-0.534</b><br>( <b>&lt;0.0001</b> ) |
| MSIS-phys (n=48)      | <b>-0.334</b><br>(0.019) | -0.273<br>(0.057)        | <b>-0.353</b><br>(0.013) | <b>-0.406</b><br>(0.004)               | <b>-0.462</b><br>(0.001)               |
| PASAT (n=49)          | 0.085<br>(0.559)         | -0.064<br>(0.661)        | 0.052<br>(0.72)          | 0.043<br>(0.766)                       | 0.176<br>(0.221)                       |
| MSIS-psych (n=48)     | 0.009<br>(0.951)         | 0.047<br>(0.746)         | -0.007<br>(0.964)        | -0.082<br>(0.574)                      | -0.067<br>(0.647)                      |
| Fatigue score (n=48)  | 0.024<br>(0.868)         | 0.052<br>(0.722)         | 0.003<br>(0.984)         | 0.014<br>(0.926)                       | 0.023<br>(0.876)                       |
| BDI (n=48)            | -0.020<br>(0.892)        | -0.037<br>(0.8)          | -0.026<br>(0.86)         | -0.163<br>(0.263)                      | -0.110<br>(0.453)                      |

| 24 month correlations | E <sub>A</sub>                  | METs                            | PhAD                            | Steps                                | RAM score                        |
|-----------------------|---------------------------------|---------------------------------|---------------------------------|--------------------------------------|----------------------------------|
| EDSS (n=42)           | -0.30<br>(0.053)                | <b>-0.320</b><br><b>(0.039)</b> | -0.275<br>(0.077)               | <b>-0.679</b><br><b>(&lt;0.0001)</b> | <b>-0.520</b><br><b>(0.0004)</b> |
| MSFC (n=50)           | <b>0.304</b><br><b>(0.032)</b>  | <b>0.352</b><br><b>(0.012)</b>  | <b>0.301</b><br><b>(0.033)</b>  | <b>0.629</b><br><b>(&lt;0.0001)</b>  | <b>0.507</b><br><b>(0.0002)</b>  |
| T25FW (n=50)          | <b>-0.347</b><br><b>(0.014)</b> | <b>-0.374</b><br><b>(0.008)</b> | <b>-0.310</b><br><b>(0.029)</b> | <b>-0.668</b><br><b>(&lt;0.0001)</b> | <b>-0.514</b><br><b>(0.0001)</b> |
| 9-HPT (n=50)          | -0.205<br>(0.153)               | <b>-0.332</b><br><b>(0.018)</b> | -0.216<br>(0.131)               | <b>-0.550</b><br><b>(&lt;0.0001)</b> | <b>-0.403</b><br><b>(0.004)</b>  |
| MSIS-phys (n=50)      | <b>-0.353</b><br><b>(0.012)</b> | <b>-0.383</b><br><b>(0.006)</b> | <b>-0.373</b><br><b>(0.008)</b> | <b>-0.433</b><br><b>(0.002)</b>      | <b>-0.440</b><br><b>(0.001)</b>  |
| PASAT (n=50)          | 0.162<br>(0.26)                 | 0.098<br>(0.498)                | 0.144<br>(0.317)                | 0.165<br>(0.252)                     | 0.240<br>(0.093)                 |
| MSIS-psych (n=50)     | -0.211<br>(0.141)               | -0.217<br>(0.130)               | -0.206<br>(0.152)               | -0.148<br>(0.306)                    | -0.168<br>(0.244)                |
| Fatigue score (n=50)  | -0.059<br>(0.684)               | -0.149<br>(0.303)               | -0.063<br>(0.665)               | -0.156<br>(0.28)                     | -0.085<br>(0.557)                |
| BDI (n=49)            | -0.156<br>(0.284)               | -0.196<br>(0.178)               | -0.175<br>(0.229)               | -0.235<br>(0.104)                    | -0.186<br>(0.20)                 |

| 30 month correlations | E <sub>A</sub>                   | METs                             | PhAD                             | Steps                                | RAM score                            |
|-----------------------|----------------------------------|----------------------------------|----------------------------------|--------------------------------------|--------------------------------------|
| EDSS (n=43)           | <b>-0.347</b><br><b>(0.019)</b>  | <b>-0.375</b><br><b>(0.011)</b>  | <b>-0.363</b><br><b>(0.014)</b>  | <b>-0.665</b><br><b>(&lt;0.0001)</b> | <b>-0.609</b><br><b>(&lt;0.0001)</b> |
| MSFC (n=46)           | <b>0.376</b><br><b>(0.008)</b>   | <b>0.421</b><br><b>(0.003)</b>   | <b>0.399</b><br><b>(0.005)</b>   | <b>0.599</b><br><b>(&lt;0.0001)</b>  | <b>0.588</b><br><b>(&lt;0.0001)</b>  |
| T25FW (n=46)          | <b>-0.484</b><br><b>(0.0004)</b> | <b>-0.510</b><br><b>(0.0002)</b> | <b>-0.487</b><br><b>(0.0004)</b> | <b>-0.708</b><br><b>(&lt;0.0001)</b> | <b>-0.705</b><br><b>(&lt;0.0001)</b> |
| 9-HPT (n=46)          | <b>-0.390</b><br><b>(0.006)</b>  | <b>-0.373</b><br><b>(0.009)</b>  | <b>-0.401</b><br><b>(0.005)</b>  | <b>-0.443</b><br><b>(0.002)</b>      | <b>-0.496</b><br><b>(0.0003)</b>     |
| MSIS-phys (n=46)      | <b>-0.295</b><br><b>(0.042)</b>  | <b>-0.346</b><br><b>(0.016)</b>  | <b>-0.304</b><br><b>(0.036)</b>  | <b>-0.378</b><br><b>(0.008)</b>      | <b>-0.437</b><br><b>(0.002)</b>      |
| PASAT (n=46)          | 0.167<br>(0.257)                 | 0.135<br>(0.361)                 | 0.170<br>(0.247)                 | 0.154<br>(0.295)                     | 0.250<br>(0.086)                     |
| MSIS-psych (n=46)     | -0.138<br>(0.35)                 | -0.222<br>(0.13)                 | -0.127<br>(0.39)                 | -0.103<br>(0.487)                    | -0.166<br>(0.260)                    |
| Fatigue score (n=46)  | -0.207<br>(0.157)                | -0.239<br>(0.102)                | -0.222<br>(0.130)                | -0.122<br>(0.407)                    | -0.216<br>(0.140)                    |
| BDI (n=46)            | -0.124<br>(0.401)                | -0.139<br>(0.345)                | -0.108<br>(0.463)                | -0.088<br>(0.550)                    | -0.159<br>(0.280)                    |

Supplementary Table 2: Spearman's rho correlation coefficients (p-value) between scores at all assessment time points. Significant correlations are highlighted in bold.

| Disability measure      | N  | Mean (or Median*) slope | SD (or IQR*) | Significance (2-tailed) |
|-------------------------|----|-------------------------|--------------|-------------------------|
| EDSS*                   | 54 | -0.08*                  | 0.18*        | <b>0.007</b>            |
| MSFC score*             | 55 | -0.05*                  | 0.19*        | <b>0.002</b>            |
| T25FW, seconds*         | 50 | -0.07*                  | 0.21*        | <b>&lt;0.0001</b>       |
| 9-HPT, seconds*         | 55 | -0.05*                  | 0.23*        | 0.074                   |
| PASAT*                  | 55 | -0.01*                  | 0.21*        | 0.257                   |
| MSIS-phys               | 55 | -0.04                   | 0.25         | 0.254                   |
| MSIS-psych*             | 55 | 0.0*                    | 0.33*        | 0.527                   |
| Fatigue score           | 55 | -0.05                   | 0.36         | 0.267                   |
| BDI*                    | 55 | 0.01*                   | 0.39*        | 0.912                   |
| E <sub>A</sub> , joules | 54 | -0.09                   | 0.27         | <b>0.023</b>            |
| METs                    | 54 | 0.11                    | 0.29         | <b>0.006</b>            |
| PhAD, hours             | 54 | -0.09                   | 0.23         | <b>0.008</b>            |
| Step count              | 54 | -0.15                   | 0.24         | <b>&lt;0.0001</b>       |
| RAM score*              | 54 | -0.05*                  | 0.15*        | <b>0.026</b>            |

Supplementary Table 3: To assess if overall progression was significantly different from zero, one sample t-tests (for parametric data) or one sample Wilcoxon tests (for non-parametric data, denoted by \*) were employed. Mean (\*or median) slopes of variables against time ( $dy/dt$ , where  $y$ =variables of disability measures,  $t$ =time) and standard deviation (\*or interquartile range, IQR) are shown with significant changes ( $p$  values) highlighted in bold. All outcome variables were converted to z-scores for this analysis, therefore a negative value represents worsening of scores for all outcome variables.

| Disability measure           | Baseline median (IQR) |                      | End median (IQR)     |                      | Significance      |               | Effect size |           |
|------------------------------|-----------------------|----------------------|----------------------|----------------------|-------------------|---------------|-------------|-----------|
|                              |                       |                      |                      |                      | (exact, 2-tailed) |               |             |           |
|                              | EDSS <6.0             | EDSS ≥6.0            | EDSS <6.0            | EDSS ≥6.0            | EDSS <6.0         | EDSS ≥6.0     | EDSS <6.0   | EDSS ≥6.0 |
| <b>EDSS</b>                  | 3.5<br>(2.5)          | 6.0<br>(0.5)         | 4.0<br>(4.0)         | 6.5<br>(0.5)         | 0.15              | <b>0.0004</b> | 0.48        | 0.59      |
| <b>MSFC score</b>            | 0.73<br>(0.71)        | -0.11<br>(1.06)      | 0.53<br>(0.78)       | -0.23<br>(1.55)      | 0.495             | <b>0.0004</b> | 0.24        | 0.56      |
| <b>T25FW, seconds</b>        | 5.95<br>(2.24)        | 11.62<br>(9.27)      | 5.94<br>(2.66)       | 14.75<br>(14.37)     | 0.10              | <b>0.0003</b> | 0.53        | 0.56      |
| <b>9-HPT, seconds</b>        | 22.21<br>(7.58)       | 27.58<br>(10.34)     | 23.98<br>(8.79)      | 26.56<br>(14.21)     | 0.32              | 0.14          | 0.34        | 0.24      |
| <b>PASAT</b>                 | 50.0<br>(8.0)         | 44.5<br>(23.0)       | 51.5<br>(13.0)       | 45.5<br>(30.25)      | 0.90              | <b>0.008</b>  | 0.05        | 0.42      |
| <b>MSIS-phys</b>             | 36.0<br>(22)          | 53.0<br>(13.75)      | 34.5<br>(19.25)      | 53.5<br>(19.5)       | 0.54              | 0.48          | 0.21        | 0.12      |
| <b>MSIS-psych</b>            | 14.0<br>(6.0)         | 18.0<br>(10.5)       | 15.0<br>(10.25)      | 20.0<br>(10.75)      | 0.63              | 0.50          | 0.23        | 0.11      |
| <b>Fatigue score</b>         | 11.0<br>(9.0)         | 14.0<br>(9.0)        | 13.5<br>(6.5)        | 16.5<br>(8.0)        | <b>0.02</b>       | 0.24          | 0.75        | 0.19      |
| <b>BDI</b>                   | 2.0<br>(2.0)          | 4.0<br>(7.0)         | 2.5<br>(6.0)         | 5.0<br>(8.0)         | 0.59              | 0.89          | 0.2         | 0.02      |
| <b>E<sub>A</sub>, joules</b> | 1434.97<br>(545.53)   | 1018.41<br>(1627.61) | 1153.77<br>(1292.15) | 769.27<br>(1383.13)  | 0.06              | 0.31          | 0.6         | 0.17      |
| <b>METs</b>                  | 1.44<br>(0.13)        | 1.21<br>(0.36)       | 1.32<br>(0.17)       | 1.18<br>(0.42)       | <b>0.03</b>       | <b>0.01</b>   | 0.69        | 0.42      |
| <b>PhAD, hours</b>           | 1.36<br>(1.11)        | 0.84<br>(1.57)       | 1.05<br>(0.91)       | 0.65<br>(1.27)       | <b>0.05</b>       | 0.23          | 0.63        | 0.2       |
| <b>Step count</b>            | 6636.75<br>(2926.67)  | 2190.23<br>(1767.83) | 4273.75<br>(3704.14) | 1480.58<br>(1790.39) | <b>0.009</b>      | <b>0.003</b>  | 0.79        | 0.47      |
| <b>RAM score</b>             | 0.42<br>(0.27)        | -0.07<br>(0.79)      | 0.22<br>(0.48)       | -0.25<br>(0.76)      | 0.08              | 0.06          | 0.56        | 0.31      |

Supplementary Table 4: Responsiveness over the 30 month follow-up period: sensitivity analysis by EDSS <6.0 and EDSS ≥6.0. Wilcoxon signed rank tests were used to assess if a significant change had occurred. Significant changes are in bold. Effect sizes were calculated by dividing the Wilcoxon Z by the square root of the number of observations ( $Z/\sqrt{n}$ ).

| Change correlations  | E <sub>A</sub>                 | METs              | PhAD             | Steps             | RAM score                      |
|----------------------|--------------------------------|-------------------|------------------|-------------------|--------------------------------|
| EDSS (n=47)          | 0.065<br>(0.663)               | -0.196<br>(0.187) | 0.005<br>(0.975) | -0.128<br>(0.390) | -0.032<br>(0.833)              |
| MSFC (n=50)          | -0.191<br>(0.184)              | -0.09<br>(0.532)  | -0.17<br>(0.238) | -0.091<br>(0.531) | -0.11<br>(0.449)               |
| T25FW (n=50)         | 0.155<br>(0.282)               | 0.024<br>(0.867)  | 0.137<br>(0.343) | 0.076<br>(0.6)    | 0.007<br>(0.964)               |
| 9-HPT (n=50)         | 0.178<br>(0.216)               | 0.088<br>(0.543)  | 0.203<br>(0.157) | 0.093<br>(0.519)  | 0.124<br>(0.391)               |
| MSIS-phys (n=50)     | 0.197<br>(0.171)               | 0.168<br>(0.243)  | 0.182<br>(0.207) | 0.014<br>(0.922)  | 0.129<br>(0.374)               |
| PASAT (n=50)         | 0.140<br>(0.333)               | 0.140<br>(0.332)  | 0.165<br>(0.253) | 0.178<br>(0.215)  | 0.176<br>(0.221)               |
| MSIS-psych (n=50)    | 0.226<br>(0.114)               | 0.154<br>(0.284)  | 0.186<br>(0.195) | 0.272<br>(0.056)  | <b>0.306</b><br><b>(0.031)</b> |
| Fatigue Score (n=50) | 0.046<br>(0.749)               | 0.098<br>(0.498)  | 0.057<br>(0.693) | 0.013<br>(0.931)  | 0.108<br>(0.456)               |
| BDI (n=49)           | <b>0.295</b><br><b>(0.039)</b> | 0.075<br>(0.608)  | 0.250<br>(0.083) | 0.246<br>(0.088)  | <b>0.356</b><br><b>(0.012)</b> |

Supplementary Table 5: Spearman's rho correlation coefficients (p-value) between change scores.

Significant correlations are highlighted in bold.



| Slope correlations          | E <sub>A</sub>    | METs              | PhAD              | Steps             | RAM score         |
|-----------------------------|-------------------|-------------------|-------------------|-------------------|-------------------|
| <b>EDSS (n=53)</b>          | 0.111<br>(0.427)  | 0.009<br>(0.949)  | 0.118<br>(0.399)  | 0.163<br>(0.244)  | 0.150<br>(0.282)  |
| <b>MSFC (n=54)</b>          | -0.023<br>(0.87)  | 0.103<br>(0.46)   | -0.041<br>(0.771) | -0.049<br>(0.727) | -0.094<br>(0.498) |
| <b>T25FW (n=54)</b>         | 0.062<br>(0.656)  | 0.064<br>(0.648)  | 0.057<br>(0.683)  | 0.221<br>(0.109)  | 0.110<br>(0.428)  |
| <b>9-HPT (n=54)</b>         | 0.174<br>(0.209)  | -0.080<br>(0.567) | 0.125<br>(0.37)   | 0.125<br>(0.368)  | 0.054<br>(0.701)  |
| <b>MSIS-phys (n=54)</b>     | -0.007<br>(0.962) | 0.079<br>(0.572)  | -0.011<br>(0.936) | 0.026<br>(0.853)  | -0.020<br>(0.885) |
| <b>PASAT (n=54)</b>         | -0.130<br>(0.351) | 0.092<br>(0.507)  | -0.145<br>(0.296) | 0.125<br>(0.368)  | -0.024<br>(0.861) |
| <b>MSIS-psych (n=54)</b>    | 0.168<br>(0.23)   | -0.034<br>(0.807) | 0.179<br>(0.2)    | -0.002<br>(0.989) | 0.023<br>(0.871)  |
| <b>Fatigue Score (n=54)</b> | 0.101<br>(0.466)  | -0.029<br>(0.836) | 0.102<br>(0.461)  | -0.053<br>(0.702) | -0.013<br>(0.925) |
| <b>BDI (n=54)</b>           | 0.002<br>(0.988)  | -0.082<br>(0.554) | 0.011<br>(0.935)  | -0.117<br>(0.399) | -0.166<br>(0.231) |

*Supplementary Table 6: Spearman's rho correlation coefficients (p-value) between the slopes of the outcome variables over the 30-month follow-up period. All outcome variables were converted to z-scores for this analysis.*

| Rate of change of slopes correlations | E <sub>A</sub>                 | METs                            | PhAD              | Steps                          | RAM score         |
|---------------------------------------|--------------------------------|---------------------------------|-------------------|--------------------------------|-------------------|
| EDSS (n=43)                           | 0.044<br>(0.779)               | <b>-0.399</b><br><b>(0.008)</b> | 0.043<br>(0.783)  | 0.150<br>(0.337)               | -0.085<br>(0.589) |
| MSFC (n=50)                           | -0.128<br>(0.367)              | -0.106<br>(0.456)               | -0.136<br>(0.337) | -0.109<br>(0.441)              | -0.17<br>(0.228)  |
| T25FW (n=50)                          | 0.009<br>(0.951)               | -0.031<br>(0.83)                | -0.007<br>(0.959) | 0.253<br>(0.071)               | -0.02<br>(0.889)  |
| 9-HPT (n=50)                          | -0.209<br>(0.137)              | -0.129<br>(0.361)               | -0.207<br>(0.141) | -0.133<br>(0.346)              | -0.271<br>(0.052) |
| MSIS-phys (n=50)                      | <b>0.279</b><br><b>(0.047)</b> | -0.189<br>(0.184)               | 0.273<br>(0.052)  | <b>0.343</b><br><b>(0.014)</b> | 0.245<br>(0.084)  |
| PASAT (n=50)                          | -0.128<br>(0.365)              | 0.136<br>(0.335)                | -0.129<br>(0.361) | 0.01<br>(0.946)                | -0.089<br>(0.529) |
| MSIS-psych (n=50)                     | 0.244<br>(0.082)               | <b>-0.332</b><br><b>(0.016)</b> | 0.255<br>(0.068)  | <b>0.274</b><br><b>(0.05)</b>  | 0.206<br>(0.143)  |
| Fatigue Score (n=50)                  | 0.102<br>(0.472)               | 0.046<br>(0.747)                | 0.066<br>(0.64)   | -0.06<br>(0.674)               | 0.141<br>(0.319)  |
| BDI (n=50)                            | 0.183<br>(0.193)               | 0.003<br>(0.984)                | 0.195<br>(0.165)  | 0.222<br>(0.114)               | 0.211<br>(0.132)  |

Supplementary Table 7: Spearman's rho correlation coefficients (p-value) between **the rate of change of slopes of the outcome variables**. Slopes were calculated for every six monthly epoch except for EDSS which was calculated using two 18 month epochs. Significant correlations are highlighted in bold. All outcome variables were converted to z-scores for this analysis.

| Averaged over: | N   | Mean   | SD     | Mean rank | Mean rank difference | Z     | Significance, (approximate, 2-tailed) |
|----------------|-----|--------|--------|-----------|----------------------|-------|---------------------------------------|
| One Day        | 326 | 2890.1 | 2674.0 | 966.1     | 11.2                 | 0.253 | >0.9999                               |
| Two Days       | 326 | 3005.9 | 2731.3 | 988.8     | -11.5                | 0.260 | >0.9999                               |
| Three Days     | 326 | 3017.3 | 2771.8 | 987.6     | -10.3                | 0.234 | >0.9999                               |
| Four Days      | 326 | 2957.5 | 2745.8 | 977.4     | -0.1                 | 0.002 | >0.9999                               |
| Five Days      | 326 | 2925.5 | 2683.8 | 973.7     | 3.6                  | 0.082 | >0.9999                               |
| Six Days       | 326 | 2912.9 | 2604.8 | 977.3     | -                    | -     | -                                     |

Supplementary Table 8: A Kruskal-Wallis test was performed to assess whether there was a difference in the mean step count between RAM device wear duration of six days versus shorter periods ( $p=0.996$ ).

| Time points (months)    | 6 | 12 | 18 | 24 | 30 |
|-------------------------|---|----|----|----|----|
| E <sub>A</sub>          | - | +  | +  | -  | -  |
| METs                    | - | +  | +  | +  | +  |
| PhAD                    | - | +  | +  | -  | +  |
| Steps                   | - | -  | +  | +  | +  |
| RAM score               | - | -  | +  | +  | +  |
| EDSS <sup>1</sup>       | - | +  | +  | -  | +  |
| MSFC <sup>2</sup>       | - | -  | -  | -  | +  |
| T25FW <sup>2</sup>      | - | -  | -  | -  | +  |
| 9HPT <sup>2</sup>       | - | -  | -  | -  | -  |
| PASAT <sup>2</sup>      | - | -  | -  | -  | -  |
| MSIS-phys <sup>3</sup>  | - | -  | -  | -  | -  |
| MSIS-psych <sup>4</sup> | - | -  | -  | -  | -  |

Supplementary Table 9: RAM variable responsiveness was assessed using Wilcoxon signed rank tests, at each time point corresponding to a clinic visit (i.e. at 6, 12, 18, 24 and 30 months), compared to baseline. If the RAM variable was significantly responsive at that time point ( $p < 0.05$ ), a "+" is shown, otherwise a "-" is shown. For the other variables the median value at each time point was compared to baseline medians. If the variable had exhibited a minimum clinically important difference (MID)<sup>1-4</sup>, a "+" is shown, otherwise a "-" is shown.

## References

1. Kurtzke JF. Rating neurologic impairment in multiple sclerosis: an expanded disability status scale (EDSS). *Neurology* 1983;33(11):1444-52. doi: 10.1212/wnl.33.11.1444
2. Rudick RA, Polman CH, Cohen JA, et al. Assessing disability progression with the Multiple Sclerosis Functional Composite. *Multiple sclerosis (Houndmills, Basingstoke, England)* 2009;15(8):984-97. doi: 10.1177/1352458509106212 [published Online First: 2009/08/12]
3. Costelloe L, O'Rourke K, Kearney H, et al. The patient knows best: significant change in the physical component of the Multiple Sclerosis Impact Scale (MSIS-29 physical). *Journal of Neurology, Neurosurgery & Psychiatry* 2007;78(8):841-44. doi: 10.1136/jnnp.2006.105759
4. McGuigan C, Hutchinson M. The multiple sclerosis impact scale (MSIS-29) is a reliable and sensitive measure. *J Neurol Neurosurg Psychiatry* 2004;75(2):266-69.
